# Supplementary material for: The Effects of Physical Activity on Positive Emotions in Children and Adolescents: A Systematic Review and Meta-Analysis
Source: MDPI journal article supplement (doi:10.3390/ijerph192114185), 2022-10-30
Supplement: s1 [file s1]

Table S1: Search strategies.

|                     |                                                                                                                                                                                                                                                                                                                                                                                                                                                                                                                                                                                                                                                                                                                                                                                                                                                                                                                                                                                       |
|---------------------|---------------------------------------------------------------------------------------------------------------------------------------------------------------------------------------------------------------------------------------------------------------------------------------------------------------------------------------------------------------------------------------------------------------------------------------------------------------------------------------------------------------------------------------------------------------------------------------------------------------------------------------------------------------------------------------------------------------------------------------------------------------------------------------------------------------------------------------------------------------------------------------------------------------------------------------------------------------------------------------|
| Web of science=2782 | ((TI=(adolescent* OR teen* OR teenager* OR student* OR juvenile OR "school-aged children")) AND TI=("physical activity" OR "physical exercise" OR "sports activities" OR "sport movement" OR sport* OR motor OR "athletic sports" OR "aerobic exercise" OR "aerobic training" OR "resistance exercise" OR "strength training" OR "muscle-strengthening exercise" OR "physical education" OR "fitness game")) AND TS=(mood* OR affect* OR emotion* OR happiness OR pleasure OR enjoyment OR subjective well-being OR self-esteem)                                                                                                                                                                                                                                                                                                                                                                                                                                                      |
| Scopus=1974         | (TITLE-ABS-KEY (adolescent* OR teen* OR teenager* OR student* OR juvenile OR "school-aged children") AND TITLE-ABS-KEY ("physical activity" OR "physical exercise" OR "sports activities" OR "sport movement" OR sport* OR motor OR "athletic sports" OR "aerobic exercise" OR "aerobic training" OR "resistance exercise" OR "strength training" OR "muscle-strengthening exercise" OR "physical education" OR "fitness game" ) AND TITLE-ABS-KEY (mood* OR affect* OR emotion* OR happiness OR pleasure OR enjoyment OR subjective well-being OR self-esteem ) )                                                                                                                                                                                                                                                                                                                                                                                                                    |
| Pub-med=6808        | ((adolescent*[Title/Abstract] OR teen*[Title/Abstract] OR teenager*[Title/Abstract] OR student*[Title/Abstract] OR juvenile[Title/Abstract] OR "school-aged children"[Title/Abstract]) AND ("physical activity"[Title/Abstract] OR "physical exercise"[Title/Abstract] OR "sports activities"[Title/Abstract] OR "sport movement"[Title/Abstract] OR sport*[Title/Abstract] OR motor[Title/Abstract] OR "athletic sports"[Title/Abstract] OR "aerobic exercise"[Title/Abstract] OR "aerobic training"[Title/Abstract] OR "resistance exercise"[Title/Abstract] OR "strength training"[Title/Abstract] OR "muscle-strengthening exercise"[Title/Abstract] OR "physical education"[Title/Abstract] OR "fitness game"[Title/Abstract])) AND (mood*[Title/Abstract] OR affect*[Title/Abstract] OR emotion*[Title/Abstract] OR happiness[Title/Abstract] OR pleasure[Title/Abstract] OR enjoyment[Title/Abstract] OR subjective well-being[Title/Abstract] OR self-esteem[Title/Abstract]) |
| EBSCOhost ERIC=2046 | AB ( adolescent* OR teen* OR teenager* OR student* OR juvenile OR "school-aged children" ) AND AB ( "physical activity" OR "physical exercise" OR "sports activities" OR "sport movement" OR sport* OR motor OR "athletic sports" OR "aerobic exercise" OR "aerobic training" OR "resistance exercise" OR "strength training" OR "muscle-strengthening exercise" OR "physical education" OR "fitness game" ) AND AB ( mood* OR affect* OR emotion* OR happiness OR pleasure OR enjoyment OR subjective well-being OR self-esteem )                                                                                                                                                                                                                                                                                                                                                                                                                                                    |
| APA PsycInfo =5003  | AB ( adolescent* OR teen* OR teenager* OR student* OR juvenile OR "school-aged children" ) AND AB ( "physical activity" OR "physical exercise" OR "sports activities" OR "sport movement" OR sport* OR motor OR "athletic sports" OR "aerobic exercise" OR "aerobic training" OR "resistance exercise" OR "strength training" OR "muscle-strengthening exercise" OR "physical education" OR "fitness game" ) AND AB ( mood* OR affect* OR emotion* OR happiness OR pleasure OR enjoyment OR subjective well-being OR self-esteem )                                                                                                                                                                                                                                                                                                                                                                                                                                                    |

Table S2 The testing tools.

| Author / Year   | Tool                                                         | Tool Description                                                                                                                                                                                                                                                                                 |
|-----------------|--------------------------------------------------------------|--------------------------------------------------------------------------------------------------------------------------------------------------------------------------------------------------------------------------------------------------------------------------------------------------|
| Kim 2007        | The Subjective Exercise Experiences Scale                    | The scale has 12 items which represent three dimensions of positive well-being (e.g., positive affect), psychological distress (e.g., anxiety, depression, stress related emotions), and fatigue.                                                                                                |
| Moore 2011      | Rosenberg Self-Esteem Scale (RSE)                            | The RSE is a 10-item scale consisting of general statements about oneself that are scored 1–4 and summed to produce a self-esteem score with a potential range of 10–40.                                                                                                                         |
| Klizas 2012     | The life satisfaction scale                                  | The multidimensional students' life satisfaction scale is a 7-item self-report inventory. The subjects had to choose one answer to evaluate each statement as "strongly disagree," "disagree," "neither disagree nor agree," "agree," and "strongly agree."                                      |
| Goldfield 2012  | Self-Perceptions Profile for Adolescents (SPPA)              | This inventory is designed to measure adolescents' perceived competence in six domains of functioning: Scholastic ability (5 items), Social competence (10 items), Athletic competence (5 items), Physical appearance (5 items), Behavioral conduct (6 items), and Global self-esteem (4 items). |
| Wood 2013       | The Adolescent Profile of Mood States Questionnaire (POMS-A) | The questionnaire is mainly used to monitor the Adolescents' mood.                                                                                                                                                                                                                               |
| Reigal 2013     | Profile of Mood States questionnaire (POMS)                  | This instrument assesses six states, namely, tension-anxiety, depression-dejection, anxiety-hostility-anger, vigor-activity, fatigue-inertia and confusion-bewilderment.                                                                                                                         |
| Von Haaren 2015 | Multidimensional Mood Questionnaire (MDMQ)                   | MDMQ is validated especially for Ambulatory Assessment. The scale measures three basic mood dimensions, valence, calmness and energetic arousal.                                                                                                                                                 |
| Lang 2016       | The Adolescent Stress Questionnaire (ASQ)                    | The ASQ measures the perceived stressfulness of events that adolescents commonly experience in their daily lives.                                                                                                                                                                                |
| Weiss 2016      | Self-Perception Profile for Adolescents (SPPA)               | These subscales tap youths' beliefs about doing well in classwork and feeling accepted by peers. Each subscale consists of five items, and responses are given in a structured-alternative format.                                                                                               |
| Shachar 2016    | Positive and Negative Affect Schedule                        | This is a self-report checklist of affect adjectives, was designed to provide independent measures of positive and negative affect.                                                                                                                                                              |
| BakırYakup 2017 | The Positivity Scale                                         | The positivity scale consists of eight items, one of which is reverse-scored. Minimum 8 and maximum 40 points can be taken from the measurement tool.                                                                                                                                            |

|                    |                                                                              |                                                                                                                                                                                                                                                                                              |
|--------------------|------------------------------------------------------------------------------|----------------------------------------------------------------------------------------------------------------------------------------------------------------------------------------------------------------------------------------------------------------------------------------------|
| Ruiz-Ariza 2017    | The Trait and Emotional Intelligence Questionnaire Short Form (TEIQue-SF)    | TEIQue-SF is composed of 30 items with seven possible responses to each statement ranging from 'Completely disagree' $\frac{1}{4}$ 1 to 'Completely agree' $\frac{1}{4}$ 7.                                                                                                                  |
| McNamee 2017       | Self-Efficacy Questionnaire (SEQ)                                            | The Self-Efficacy Questionnaire was used to assess confidence in participants' ability to be physically active. The eight items on the SEQ were rated on a 5-point scale ranging from 1 (disagree a lot) to 5 (agree a lot), with higher scores reflecting greater levels of confidence.     |
| Roh 2018           | The Korean Version of the Profile of Mood State-Brief (K-POMS-B)             | To estimate the mood state, this questionnaire consists of a total of 30 items.                                                                                                                                                                                                              |
| Brand 2019         | A computerized test                                                          | The test included two levels of task difficulty and two concepts of emotion processing, namely, emotion labeling and emotion matching.                                                                                                                                                       |
| Stolarska 2019     | The UWIST Mood Adjective Check List                                          | The list assesses three dimensions, has been utilized in several exercise studies.                                                                                                                                                                                                           |
| Fidelix 2019       | Rosenberg Self-Esteem Scale                                                  | It was used to measure self-esteem. It has 10 items that assess attitudes and positive or negative sense of self, encompassing issues relating to personal satisfaction, self-deprecation, perception qualities, competence, pride in themselves, self-worth, respect, and sense of failure. |
| Herbert 2020       | The Positive and Negative Affect Schedule                                    | The state scale assesses positive and negative affect at a given point in time.                                                                                                                                                                                                              |
| Engels 2020        | Questionnaire for the Assessment of Enjoyment in Physical Education (QUAEPE) | The Questionnaire is to measure the Enjoyment of physical three facets (pleasure, flow experience, recovery).                                                                                                                                                                                |
| Shaposhnikova 2021 | WAM methodology                                                              | The test includes: Well-being, Activity, Mood.                                                                                                                                                                                                                                               |
| Znazen 2021        | BRUMS                                                                        | This questionnaire contains 24 items divided into six respective subscales: anger, confusion, depression, fatigue, tension, and vigour.                                                                                                                                                      |
| McDonough 2021     | Self-efficacy instrument                                                     | To assess participants' perceived PA-related self-efficacy immediately after each exergaming session.                                                                                                                                                                                        |
| Bessa 2021         | Competitive State Anxiety Inventory-2 (CSAI-2)                               | CSAI-2 has been widely used as a means of explaining the independent forms of influence of somatic anxiety, cognitive anxiety, and self-confidence on sport performance.                                                                                                                     |
| Pastor 2021        | Short form of the Positive and Negative Affect Schedule                      | The Schedule was used to measure positive and negative feelings before and after the sessions of physical education.                                                                                                                                                                         |
